# Supplementary material for: Preferential Ribosome Loading on the Stress-Upregulated mRNA Pool Shapes the Selective Translation under Stress Conditions
Source: MDPI journal article supplement (doi:10.3390/plants10020304), 2021-02-05
Supplement: s1 [file s1]

**A**

**Regulation of gene expression**

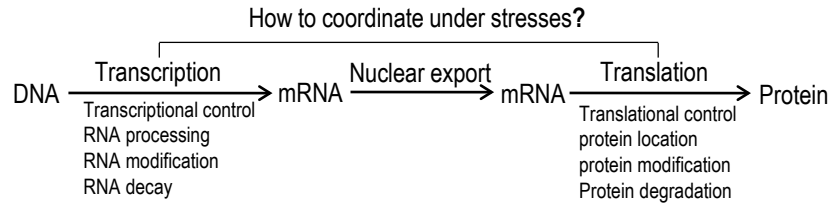

**B**

**Methodology for profiling transcriptome and translome**

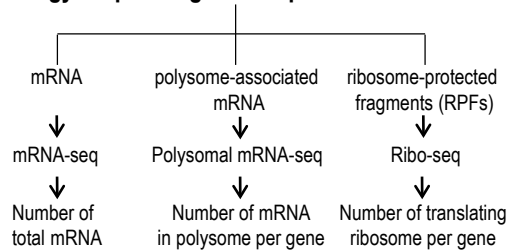

**Figure S1.** Schematic of gene expression regulation and related methodologies.

Figure S2

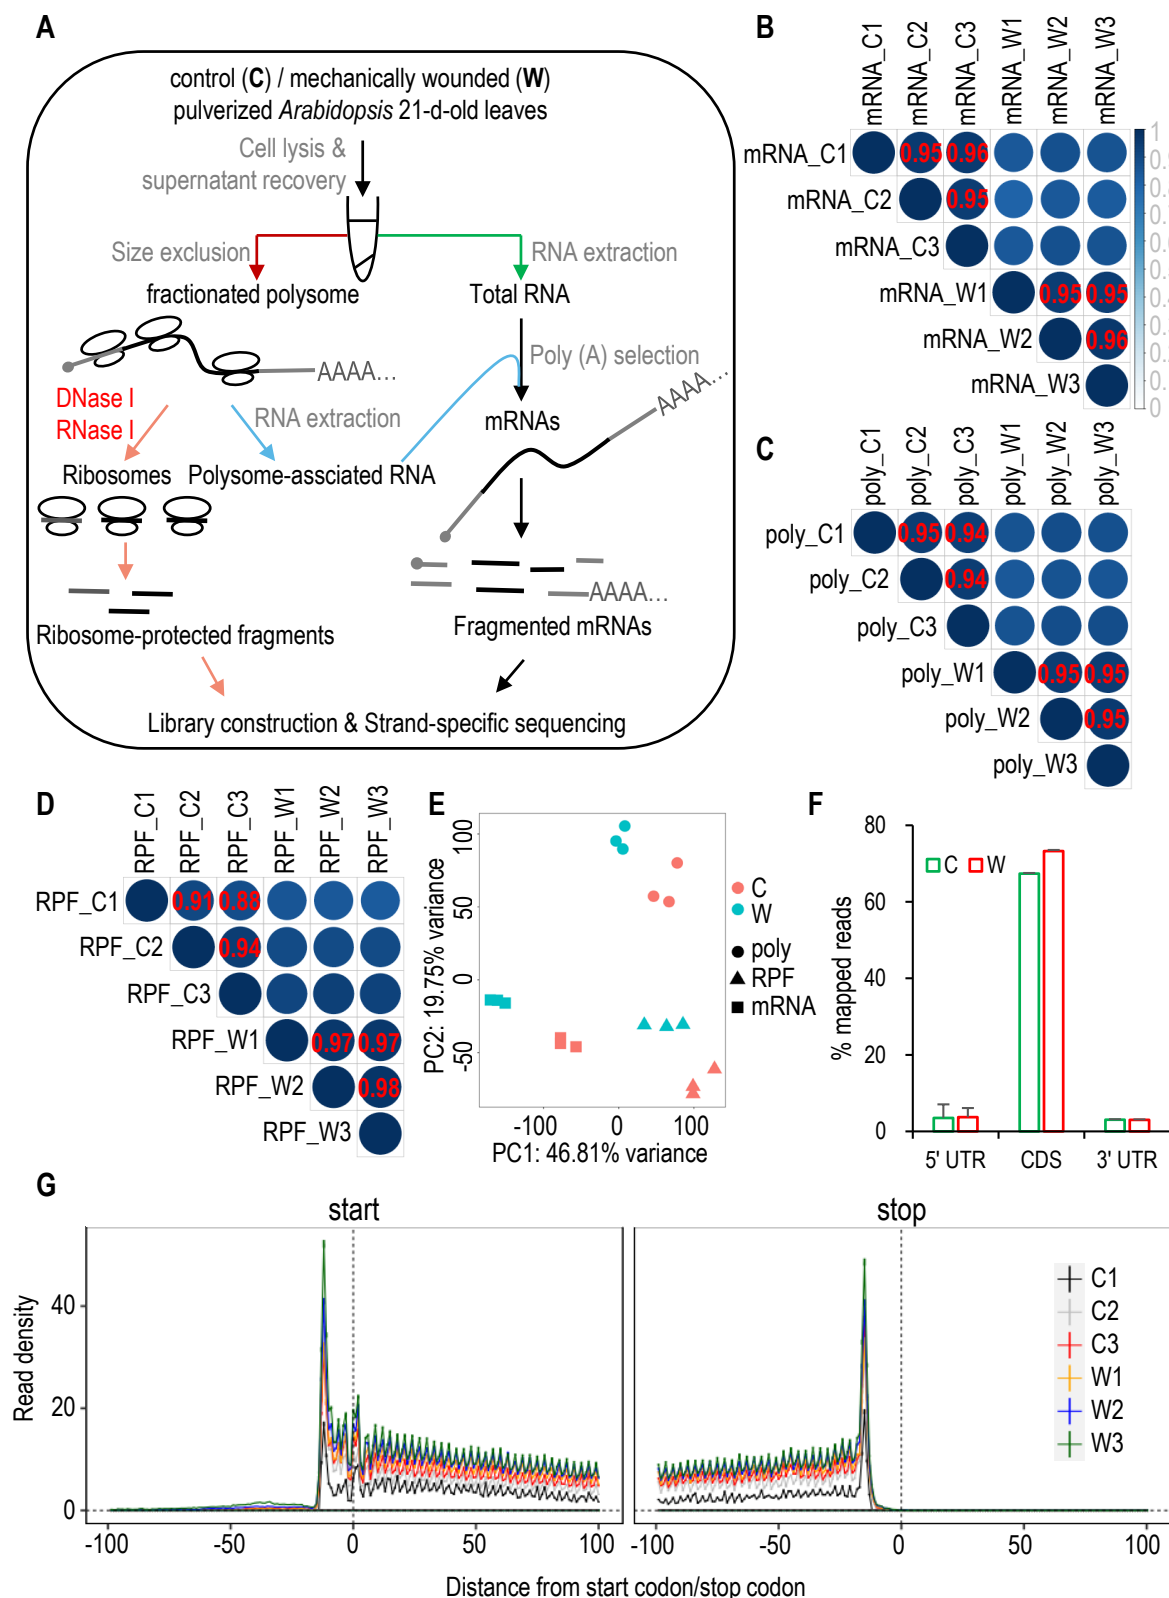

**Figure S2.** Schematic representation of experimental design and the characteristics of ribosome profiling data from control and wounded *Arabidopsis* leaves. (A) Overview of experimental strategy. Total mRNA-seq, polysome associated mRNA-seq and ribosome profiling were performed with C (control) and W (wounded) leaves. In total, ~18 and ~41 million (M) uniquely mapped reads were obtained from ribosome profiling libraries for the control (C1 2.33 M, C2 5.38 M, C3 10.54 M) and wounded (W1 11.30 M, W2 15.02 M, W3 15.14 M) samples, respectively. Likewise, ~16 and ~17 M from total mRNA-seq libraries (C1 4.27 M, C2 7.58 M, C3 5.01 M, W1 4.14 M, W2 8.43 M, W3 5.20 M); ~28 and ~14 M from polysome associated mRNA-seq libraries (C1 11.89 M, C2 11.37 M, C3 5.27 M, W1 5.18 M, W2 4.09 M, W3 4.83 M). (B-D) High correlation across three biological replicates of the total mRNAs (mRNA), polysome associated mRNAs (poly) and ribosome-protected fragments (RPF) sequencing libraries with or without wounding. The base-2 logarithm ( $\log_2$ ) of the Transcripts Per Million (TPM) was used to calculate the Pearson correlation coefficient between samples; The colored number is the Pearson correlation coefficient between two samples. (E) Principal component analysis (PCA) of three biological replicates from total mRNAs (mRNA), polysome-associated mRNAs (poly) and ribosome-protected fragments (RPF) before and after wounding. (F) Percentages of RPFs assigned to the CDS, 5' UTR and 3' UTR in C and W samples. (G) Read density of the RPFs 5'-end around the annotated start or stop codon (100-nt upstream and downstream).

Figure S3

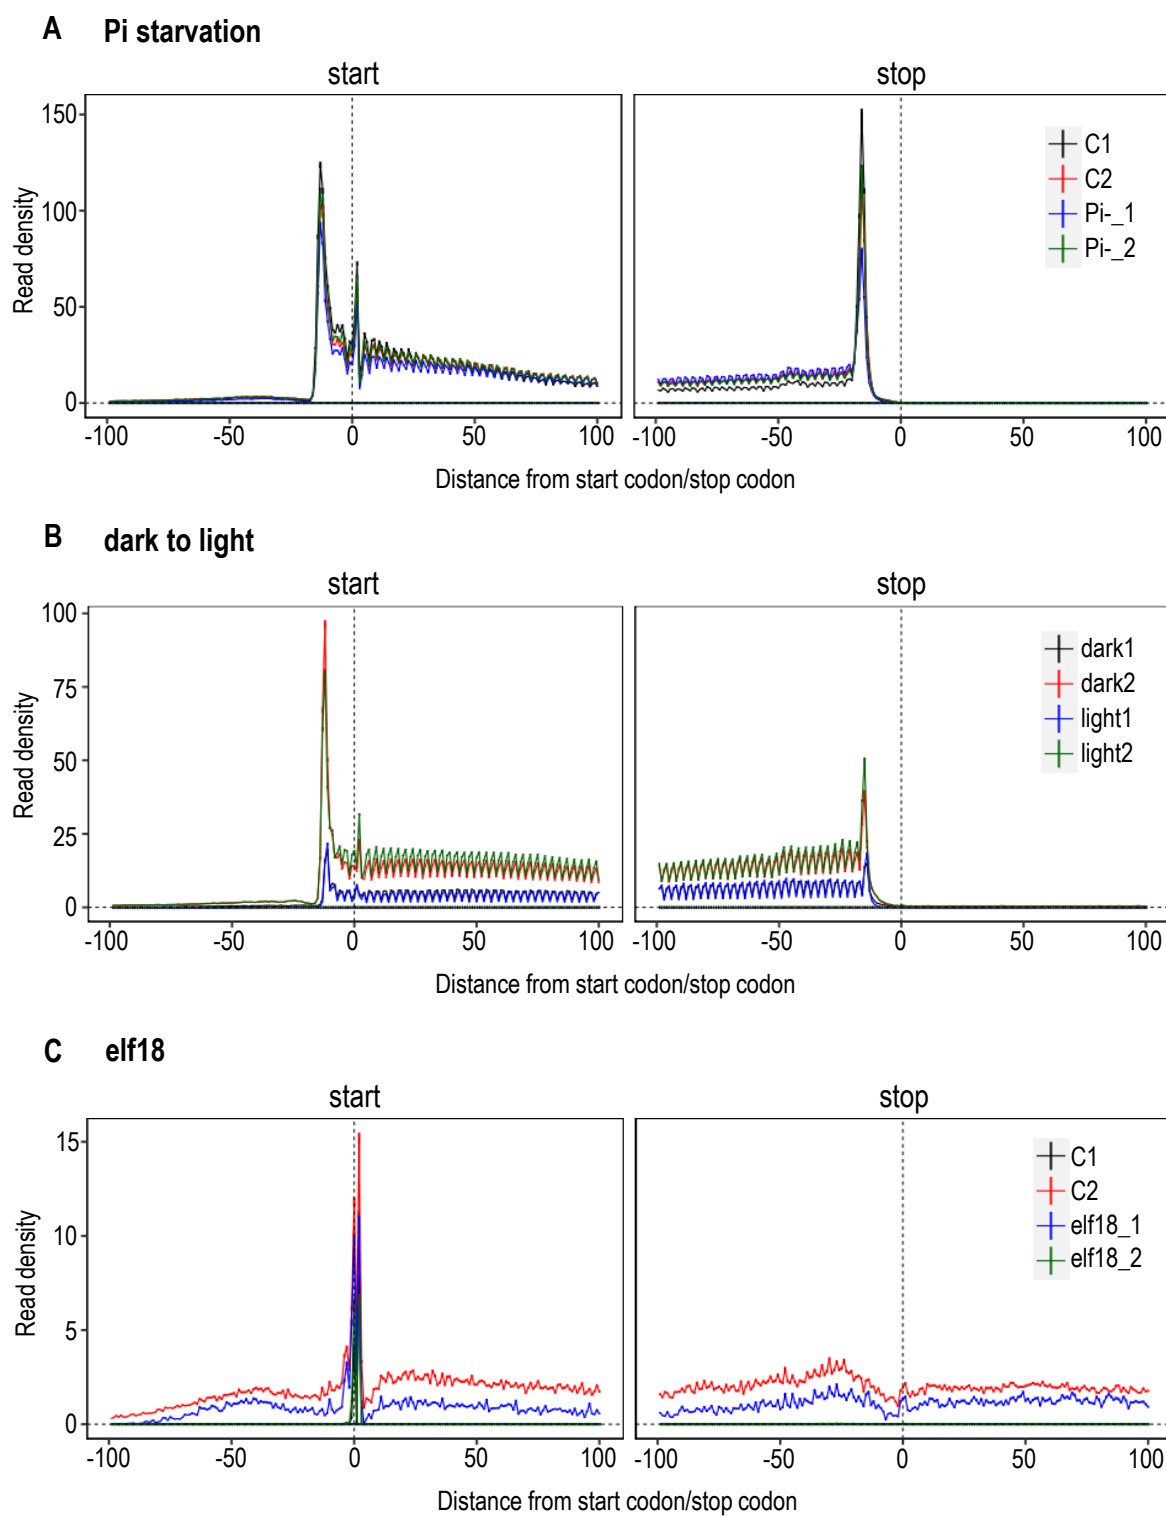

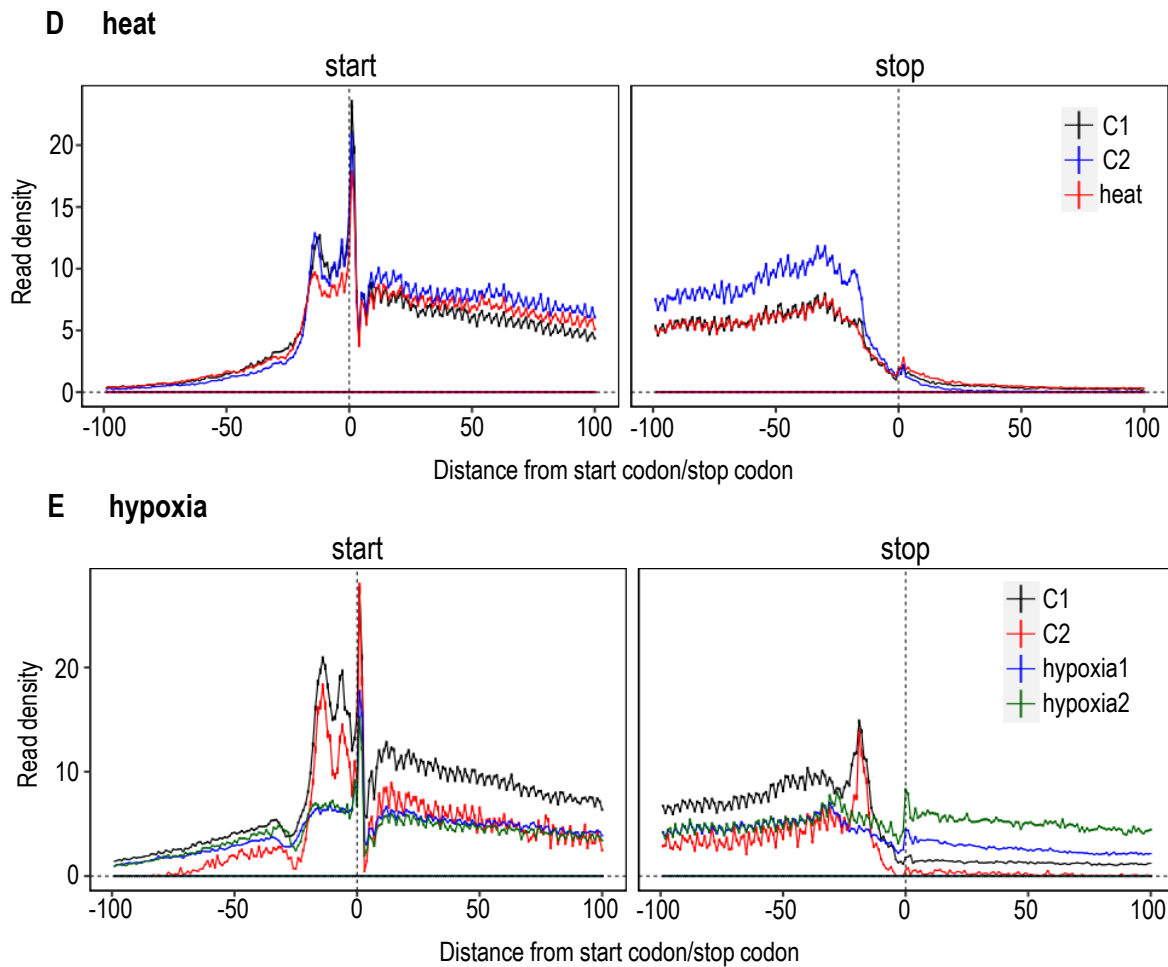

**Figure S3.** Read density of the RPFs 5'-end around the annotated start or stop codon (100-nt upstream and downstream) under different stresses: (A) Pi starvation, (B) dark to light, (C) elf18, (D) heat and (E) hypoxia.

Figure S4

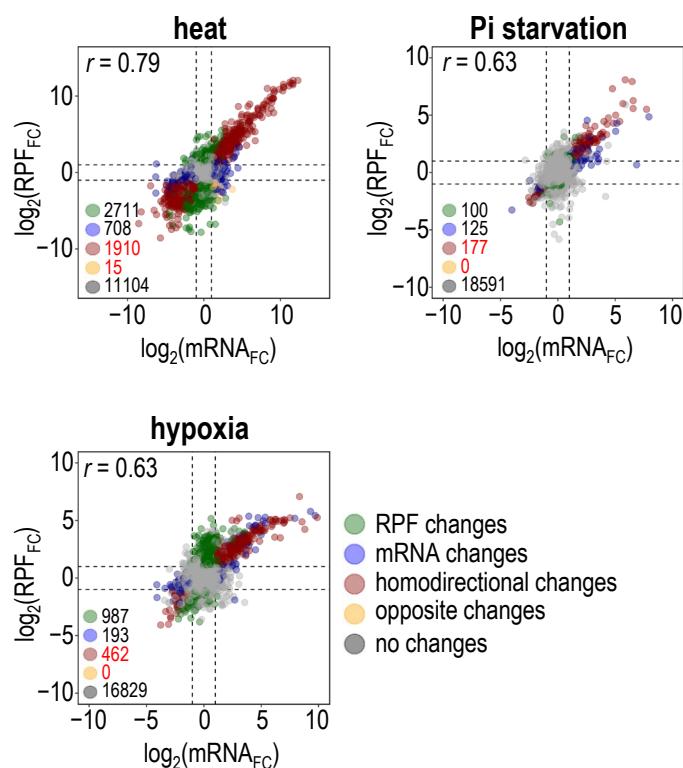

**Figure S4.** Correlations of  $\text{mRNA}_{\text{FC}}$  and  $\text{RPF}_{\text{FC}}$  introduced by indicated stresses. Detailed description as in Figure 1B.

Figure S5

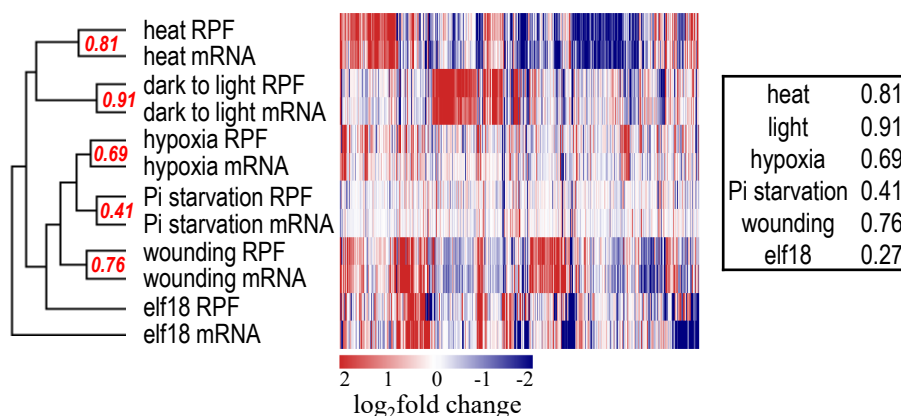

**Figure S5.** Relationships between mRNA<sub>FC</sub> and RPF<sub>FC</sub> under different stresses. Hierarchical cluster analysis was conducted on 7456 genes, which are differentially expressed at both mRNA and RPF levels under at least one of the indicated stresses. Each column represents one gene and each row represents one experimental dataset. log<sub>2</sub>FC of each gene at mRNA and/or RPF levels under each stress are color coded with a bar at the bottom. Pearson correlations of mRNA<sub>FC</sub> and RPF<sub>FC</sub> upon each stress are visualized with a tree on the left and a table on the right.

Figure S6

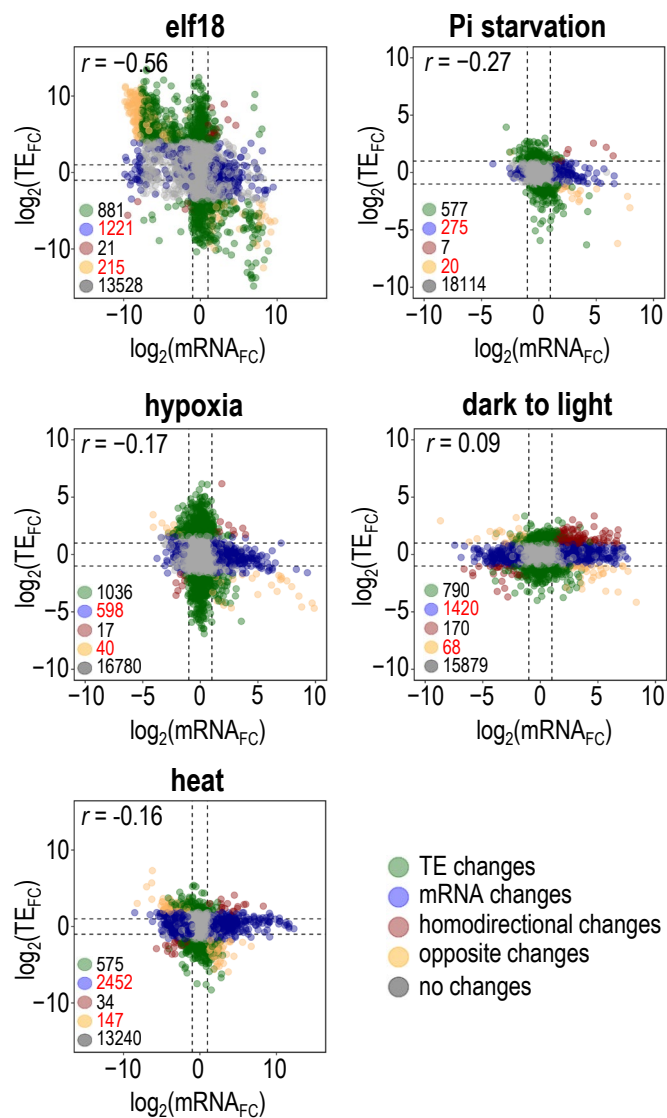

**Figure S6.** Correlations of  $\text{mRNA}_{\text{FC}}$  and  $\text{TE}_{\text{FC}}$  introduced by indicated stresses. Detailed description as in Figure 1F.



Figure S7

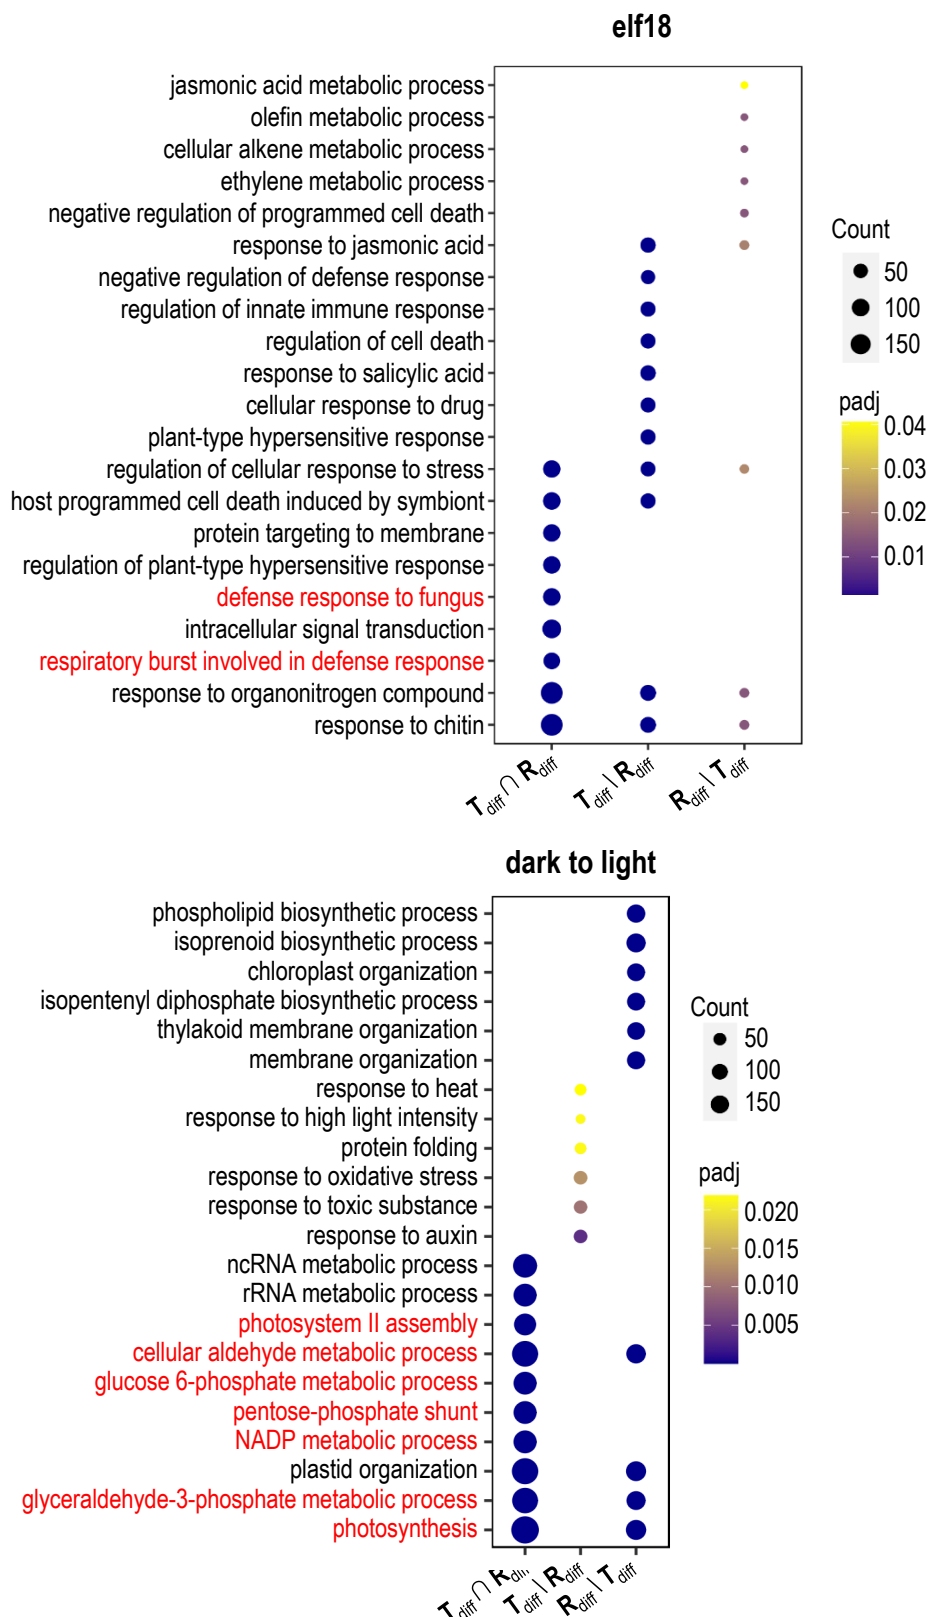

Figure S7

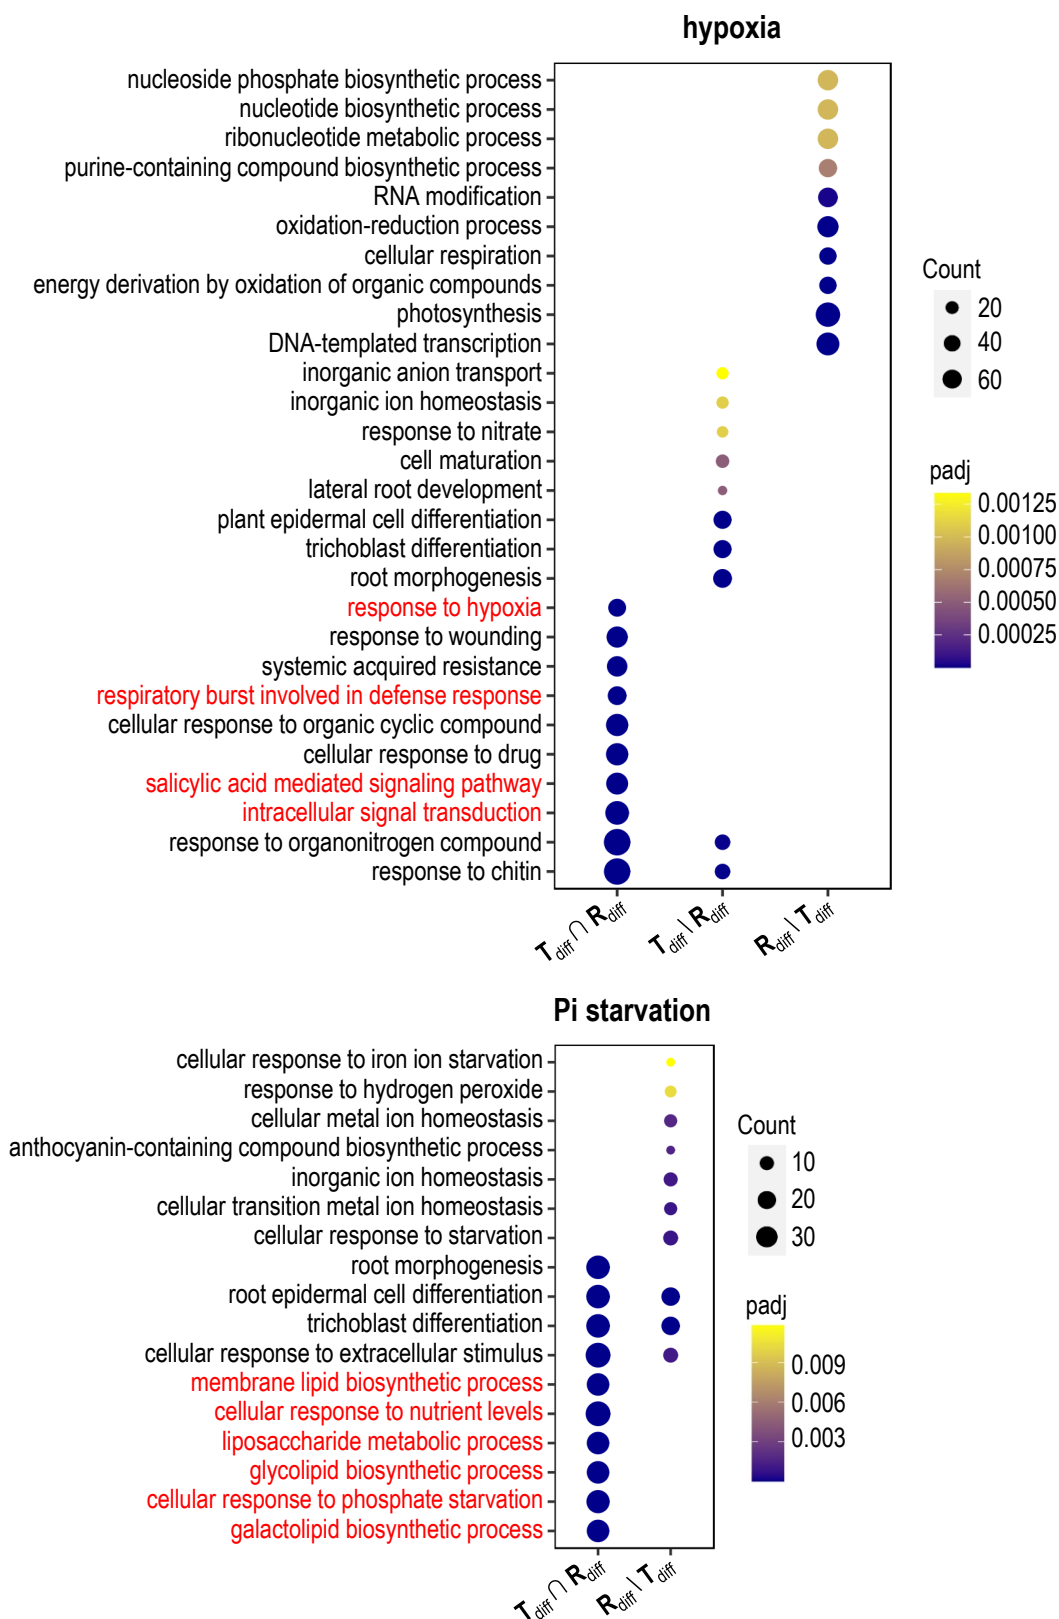

Figure S7

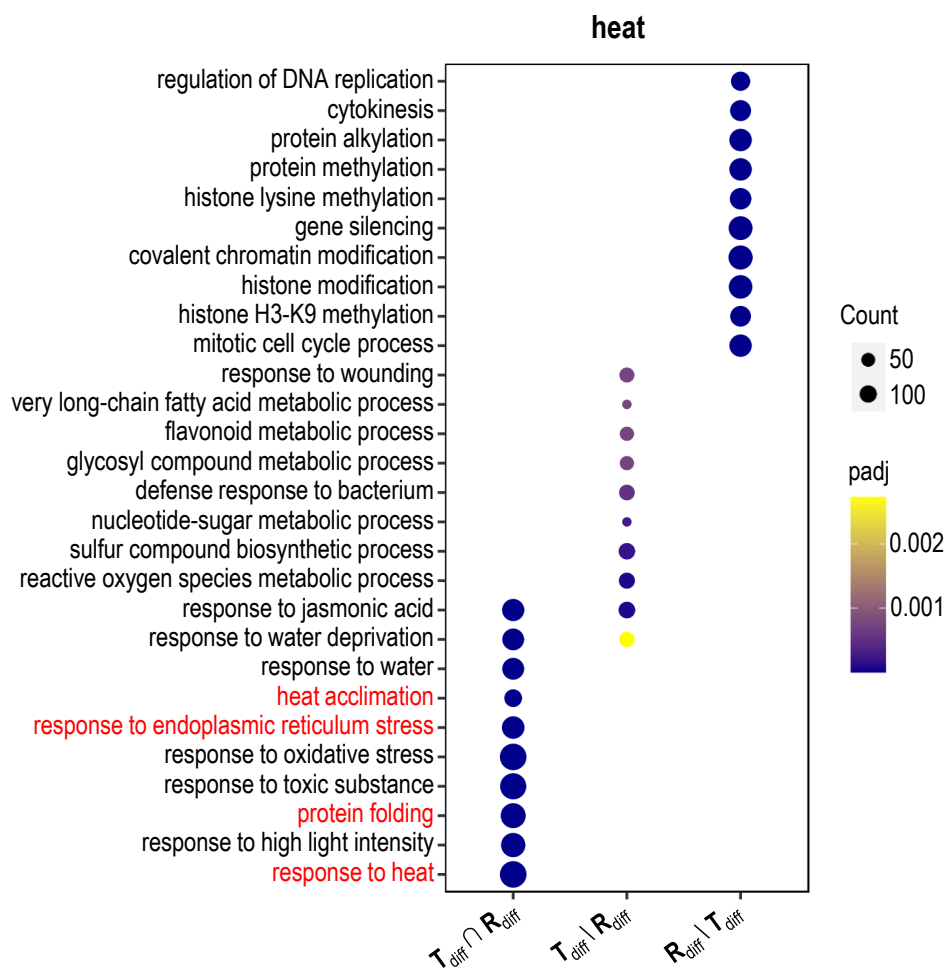

**Figure S7.** Functional categories of differentially expressed genes under different stresses. Detailed description as in Figure 3B.

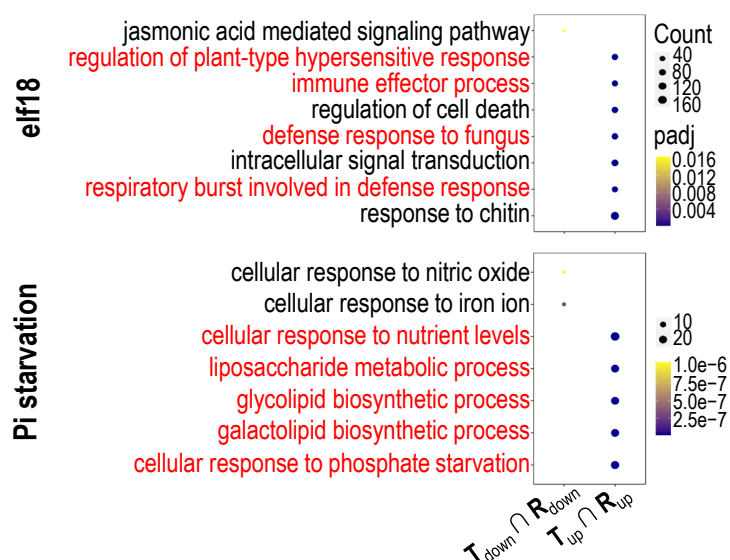

**Figure S8.** Functional categories of up- or down-regulated genes in response to elf18 or Pi starvation.  $T_{up} \cap R_{up}$  represents genes up-regulated at both transcriptional (mRNA) and translational (RPF) levels;  $T_{down} \cap R_{down}$  represents genes down-regulated at both transcriptional and translational levels.
