# Supplementary material for: Preferential Ribosome Loading on the Stress-Upregulated mRNA Pool Shapes the Selective Translation under Stress Conditions
Source: MDPI journal article supplement (doi:10.3390/plants10020304), 2021-02-05
Supplement: s1 [file s1]

## Detailed description and code for the bioinformatic analysis:

### 1. Acquisition of the public datasets used in this study:

In this study, we used the published datasets from five studies interpreting different stress responses in Arabidopsis, including dark to light transition, heat, hypoxia, Pi starvation and the pathogen-associated molecular pattern (elf18). The list of all the public datasets used in this study and the code for data acquisition are as below:

#### (1) Public datasets used in this study:

##### Dark to light transition:

|            |               |
|------------|---------------|
| GSM1068665 | mRNASS-Dark   |
| GSM1068666 | mRNASS-L4h    |
| GSM1068667 | mRNARP-Dark   |
| GSM1068668 | mRNARP-L4h    |
| GSM1226366 | mRNASS-Dark_2 |
| GSM1226367 | mRNASS-L4h_2  |
| GSM1226368 | mRNARP-Dark_2 |
| GSM1226369 | mRNARP-L4h_2  |

##### Heat:

|            |                                  |
|------------|----------------------------------|
| GSM1709060 | control RNA                      |
| GSM1709061 | control RPF                      |
| GSM1709062 | control RNA biological replicate |
| GSM1709063 | control RPF biological replicate |
| GSM1709064 | heat stress RNA                  |
| GSM1709065 | heat stress RPF                  |

##### Hypoxia:

|            |                  |
|------------|------------------|
| GSM1224473 | RS_Stress1       |
| GSM1224474 | RS_Stress3       |
| GSM1224475 | RS_NoStress2     |
| GSM1224476 | RS_NoStress3     |
| GSM1224479 | Total_no_stress1 |
| GSM1224480 | Total_stress1    |
| GSM1224483 | Total_no_stress2 |
| GSM1224484 | Total_stress2    |

##### Pi starvation:

|            |                                 |
|------------|---------------------------------|
| GSM2601708 | RS_NoStress (two replicates)    |
| GSM2601709 | RS_P_Stress (two replicates)    |
| GSM2601710 | Total_NoStress (two replicates) |
| GSM2601711 | Total_P_stress (two replicates) |

**Pathogen-associated molecular pattern (elf18):**

```
GSM2306286 RS-Mock Rep1
GSM2306287 RS-Mock Rep2
GSM2306288 RS-elf18 Rep1
GSM2306289 RS-elf18 Rep2
GSM2306290 RF-Mock Rep1
GSM2306291 RF-Mock Rep2
GSM2306292 RF-elf18 Rep1
GSM2306293 RF-elf18 Rep2
```

**(2) Data acquisition:**

```
a="cat SraAccList.txt" # SraAccList.txt is the Sequence Read Archive (SRA) accession list
for i in $a;do prefetch -O ./ $i;done
```

**(3) From SRA to fastq:**

```
# using the fastq-dump command to convert the SRA file to fastq
fastq-dump --split-3 accession.sra
```

**2. Quality assessment using the software FASTQC**

```
find *.fastq | xargs fastqc -t 10 # * represents the filename
```

**3. Adaptor removal by cutadapt (version 2.4)**

```
# all the public datasets were generated by single end sequencing, and our self-produced data were
obtained through pair end sequencing
```

```
# * represents the filename
```

```
# reads shorter than 20 nt were removed through the parameter -m 20.
```

**# Dark to light transition:**

```
cutadapt -a CTGTAGGCACCATCAAT -z -O 5 -e 0.1 -m 20 -q 20 -o *clean.fastq *.fastq
```

**# Heat:**

```
cutadapt -a TGGAATTCTC -z -O 5 -e 0.1 -m 20 -q 20 -o *clean.fastq *.fastq
```

**# Hypoxia:**

```
cutadapt -a TGGAATTCTC -z -O 5 -e 0.1 -m 20 -q 20 -o *RNA.clean.fastq *RNA.fastq
```

```
cutadapt -a AAAAAAAAAAAAA -z -O 5 -e 0.1 -m 20 -q 20 -o *RPF.clean.fastq *RPF.fastq
```

**# Pi starvation:**

```
cutadapt -a CTGTAGGCACCATCAATAGATCGGAAGAG -z -O 5 -e 0.1 -m 20 -q 20 -o
```

```
*RNA.clean.fastq *RNA.fastq
```

```
cutadapt -a AGATCGGAAGAGCACACGTCTGAACTCCAGTCA -z -O 5 -e 0.1 -m 20 -q 20 -o
```

```
*RPF.clean.fastq *RPF.fastq
```

**# Pathogen-associated molecular pattern (elf18):**

```
cutadapt -a CTGTAGGCACCATCAAT -z -O 5 -e 0.1 -m 20 -q 20 -o *clean.fastq *.fastq
```

**# Wounding (self-produced data):**

```
cutadapt -a TGG AATTCTCGGGTG -A GATCGTCCGACTGTA -z -e 0.1 -O 5 -m 20 -q 20 -o
*RPF.clean.R1.fq.gz -p *RPF.clean.R2.fq.gz *RPF.R1.fastq.gz *RPF.R2.fastq.gz
cutadapt -a AGATCGGAAGAGCACACGT -A AGATCGGAAGAGCACACGT -z -O 5 -e 0.1 -m
20 -q 20 -o *total (poly).clean.R1.fq.gz -p total (poly).clean.R2.fq.gz *total (poly).R1.fastq.gz
*total (poly).R2.fastq.gz
```

**4. Align clean reads to the TAIR10 genome using STAR (version 2.7.4a)**

**Dark to light transition/Heat/Hypoxia/Pi starvation/elf18:**

**# single-end mapping (for public data)**

```
STAR --genomeDir /public/genome/arabidopsis/tair10/star-index --runThreadN 16 --readFilesIn
*clean.fastq --outFileNamePrefix ./*_ --outSAMtype BAM SortedByCoordinate
--outFilterMismatchNmax 2 --outFilterMultimapNmax 1
```

**# pair-end mapping (for self-produced wounding data):**

```
STAR --genomeDir /public/genome/arabidopsis/tair10/star-index --runThreadN 16
--readFilesCommand zcat --readFilesIn *clean_R1.fq.gz *clean_R2.fq.gz
--outFileNamePrefix ./*_ --outSAMtype BAM SortedByCoordinate --outFilterMismatchNmax 2
--outFilterMultimapNmax 1
```

**5. Read assignment to genomic features using featureCounts (version 1.6.5)**

**# Read assignment to exons:**

**# input data is the uniquely mapped reads (\*.bam)**

**# read counts along exons were used for differential expression analysis**

```
/software/subread-1.6.5-Linux-x86_64/bin/featureCounts -T 16 -t exon -g gene_id -s 1 -a
araport11.gtf -o *count.txt *.bam
```

**# Read assignment to CDS / 5' UTR / 3' UTR:**

**# input data is the uniquely mapped reads (\*.bam)**

**# this analysis is only conducted on our self-produced Ribo-seq data**

```
/software/subread-1.6.5-Linux-x86_64/bin/featureCounts -T 16 -t CDS/
five_prime_utr/three_prime_utr -g gene_id -s 1 -a araport11.gtf -o *count.txt *.bam
```

**6. Visualization of the read coverage via Integrative Genomics Viewer (IGV)**

```
samtools sort *.bam > *.sort.bam
```

```
samtools index *.sort.bam
```

```
bamCoverage -p 8 --normalizeUsing RPKM --binSize 10 -b *.sort.bam -o *.bw # the *.bw file was
loaded to the IGV for visualization
```

**7. Calculation of RPKM**

**# this script was used to calculate the RPKM values for all the samples in this study.**

**# input data is the read count matrix**

**# the number 80.89 was calculated from 1000 / library size (M)**

```
# column 6 ($6) is gene length
cat *count.txt | awk '{print $1,$7*80.89/$6}' OFS="\t" | sort -k1,1 -k2,2n > *RPKM.txt
```

## 8. Calculation of TPM

```
# this script was used to calculate the TPM values for all the wounding-treated samples;
# log2TPM was used to perform correlation analysis in Figure 1A, Figure S2B-D.
# input data is the read count matrix
Count<-read.csv("*count_matrix.csv",head=T,stringsAsFactors = F)
kb <- Count$Length/ 1000 # Length is the gene length
countdata <- Count[,3:8] # column 1 is the gene ID; column 2 is the gene length
rpk <- countdata / kb
tpm <- data.frame(t(t(rpk)/colSums(rpk) * 1000000))
head(tpm)
tpm$gene=Count$Geneid # add the gene ID to the TPM file
write.csv(tpm,file="*TPM.csv",row.names = F)
```

## 9. Calculation of Pearson correlation coefficient

```
# input data is the log2TPM matrix for Figure 1A, Figure S2B-D
# input data is the log2FC matrix for Figure 1B-F, Figure 2B and C, Figure S4, Figure S5
# fold change (FC) is obtained from section 10
data=read.table("log2 TPM(FC).txt", header=T, row.names=1, sep="\t")
head(data)
cor_matr=cor(data)
head(cor_matr)
write.table(cor_matr,"coefficient_matrix.txt",sep="\t")
```

## 10. Differential expression analysis by DESeq2 (R package)

```
# this script was used to call differentially expressed genes
# input data is the read count matrix
m=read.delim("count_matrix.txt", head=T)
colnames(m)=c("Gene_ID","control_1","control_2","control_3","stress_1","stress_2","stress_3")
rownames(m) <-m[,1]
count_data<-m[,2:7] # column 1 is the gene ID
condition<-factor(c(rep("control",3), rep("stress",3)), levels = c("control","stress")) # “3”
represents the number of biological replicates for control and stress samples
col_data<-data.frame(row.names=colnames(count_data), condition)
library("DESeq2")
dds <- DESeqDataSetFromMatrix(countData=count_data,colData=col_data,design=~ condition)
dds<-DESeq(dds)
res<-results(dds)
summary(res)
resdata=merge(as.data.frame(res),as.data.frame(counts(dds,normalize=TRUE)),by="row.names",sort=FALSE)
write.csv(resdata,file="diff_res.csv",row.names=F)
```

## 11. Calculation of translation efficiency (TE) changes using DESeq2

```
# translational efficiency (TE) of each gene is defined as the ratio of RPF to total mRNA;  
# under stress conditions, changes in translational efficiencies (TE) can be calculated by ratios of  
# ratios for two conditions: (Ribo_stress/mRNA_stress)/(Ribo_control/mRNA_control)  
# input data is the read count matrix  
m=read.delim("count_matrix.txt",head=T)  
colnames(m)=c("Gene_ID","RPF_control_1","RPF_control_2","RPF_control_3","RPF_stress_1",  
"RPF_stress_2","RPF_stress_3","RNA_control_1","RNA_control_2","RNA_control_3","RNA_str  
ess_1","RNA_stress_2","RNA_stress_3")  
rownames(m) <-m[,1]  
count_data<-m[,2:13] # column 1 is the gene ID  
count_data<-round(as.matrix(count_data))  
condition<-factor(c(rep("control",3), rep("stress",3), rep("control",3), rep("stress",3)), levels =  
c("control","stress")) # "3" represents the number of biological replicates for control and stress  
samples  
col_data<-data.frame(assay=factor(rep(c("Ribo", "mRNA"),  
each=4)),condition=condition,row.names=colnames(count_data))  
write.table(col_data,file="coldata.txt",row.names=F,quote=F,sep="\t")  
library("DESeq2")  
dds<-DESeqDataSetFromMatrix(countData=as.matrix(count_data[,row.names(col_data)]),colData  
=col_data,design=~ assay+condition+assay:condition)  
model.matrix(~ assay+condition+assay:condition, col_data)  
dds <-DESeq(dds, test="LRT", reduced=~ assay+condition)  
res<- DESeq2::results(dds)  
head(res[order(res$padj),],4)  
write.table(res, file="TE.txt",quote=F, col.names=NA, sep="\t")  
resdata=merge(as.data.frame(res),as.data.frame(counts(dds,normalize=TRUE)),by="row.names",s  
ort=FALSE)  
write.csv(resdata,file="TE.csv",row.names = F)
```

## 12. GO analysis

```
x = read.table("genelist.txt",header=F) # input data is the gene ID of differentially expressed  
genes  
head(x)  
x = as.vector(as.matrix(x[,1]))  
ego_ALL <-enrichGO(x, OrgDb="org.At.tair.db", keyType="TAIR", ont="ALL",  
pvalueCutoff=0.05, pAdjustMethod="BH", qvalueCutoff=0.1, readable=T)  
write.csv(ego_ALL, file="GO_ALL_TAIR.csv", quote=F)
```

### 13. Meta-analysis

# the following code allows to reproduce metagene plots in Figure S2G and Figure S3

# 100 bp upstream/downstream of the start/stop codon were extracted and split into 1-bp bin.

Thus, for each gene, there are 200 bins around the start or stop codon, respectively

# extract the annotated start or stop codons from Araport11 annotation

```
awk '{if($3=="start_codon")print $0}' OFS="\t" araport11.gtf > start_codon.gtf
```

```
awk '{if($3=="stop_codon")print $0}' OFS="\t" araport11.gtf > stop_codon.gtf
```

# convert the gtf file to bed format

```
cut -f 9 start_codon.gtf | cut -d ";" -f 2 | sed 's/ transcript_id//g' | paste - start_codon.gtf | awk '{print $2,$5-1,$6,$1,1,$8}' OFS="\t" | sort -k1,1 -k2,2n > start_codon.bed
```

```
cut -f 9 stop_codon.gtf | cut -d ";" -f 2 | sed 's/ transcript_id//g' | paste - stop_codon.gtf | awk '{print $2,$5-1,$6,$1,1,$8}' OFS="\t" | sort -k1,1 -k2,2n > stop_codon.bed
```

# extend by 100 bp upstream and downstream of the start/stop codon

awk

```
'{if($6=="+"){$7=$2-100;$8=$2+100;print$1,$7,$8,$4,$5,$6}else{$7=$3-100;$8=$3+100;print$1,$7,$8,$4,$5,$6}}' OFS="\t" start_codon.bed > start_codon±100bp.bed
```

```
awk '{if($6=="+")print $0}' OFS="\t" start_codon±100bp.bed > start_codon.plus.bed
```

```
awk '{if($6=="-")print $0}' OFS="\t" start_codon±100bp.bed > start_codon.minus.bed
```

awk

```
'{if($6=="+"){$7=$2-100;$8=$2+100;print$1,$7,$8,$4,$5,$6}else{$7=$3-100;$8=$3+100;print$1,$7,$8,$4,$5,$6}}' OFS="\t" stop_codon.bed > stop_codon±100bp.bed
```

```
awk '{if($6=="+")print $0}' OFS="\t" stop_codon±100bp.bed > stop_codon.plus.bed
```

```
awk '{if($6=="-")print $0}' OFS="\t" stop_codon±100bp.bed > stop_codon.minus.bed
```

# make 1-bp bins

```
bedtools makewindows -b start_codon.plus.bed -w 1 -i srcwinnum | tr " " "\t" | awk
```

```
'BEGIN{OFS="\t"}{$6="+";print $0}' > start_codon.plus.bin.bed
```

```
bedtools makewindows -b start_codon.minus.bed -w 1 -i srcwinnum | tr " " "\t" | awk
```

```
'BEGIN{OFS="\t"}{$6="-";print $0}' > start_codon.minus.bin.bed
```

```
awk '{print $5}' start_codon.minus.bin.bed | tac > minus.start_codon.order
```

```
paste minus.start_codon.order start_codon.minus.bin.bed | awk '{print $2,$3,$4,$5,$1,$7}'
```

```
OFS="\t" > start_codon.minus.bin2.bed
```

```
cat start_codon.plus.bin.bed start_codon.minus.bin2.bed | sort -k1,1 -k2,2n >
```

```
start_codon.1bpbin.bed
```

```
bedtools makewindows -b stop_codon.plus.bed -w 1 -i srcwinnum | tr " " "\t" | awk
```

```
'BEGIN{OFS="\t"}{$6="+";print $0}' > stop_codon.plus.bin.bed
```

```
bedtools makewindows -b stop_codon.minus.bed -w 1 -i srcwinnum | tr " " "\t" | awk
```

```
'BEGIN{OFS="\t"}{$6="-";print $0}' > stop_codon.minus.bin.bed
```

```

awk '{print $5}' stop_codon.minus.bin.bed | tac > minus.stop_codon.order
paste minus.stop_codon.order stop_codon.minus.bin.bed | awk '{print $2,$3,$4,$5,$1,$7}'
OFS="\t" > stop_codon.minus.bin2.bed
cat stop_codon.plus.bin.bed stop_codon.minus.bin2.bed | sort -k1,1 -k2,2n >
stop_codon.1bpbin.bed

```

```

sed 's/"//g' start_codon.1bpbin.bed > start_codon.1bpbin_1.bed
sort -k1,1 -k4,4 start_codon.1bpbin_1.bed > start_codon.1bpbin_2.bed
sed 's/"//g' stop_codon.1bpbin.bed > stop_codon.1bpbin_1.bed
sort -k1,1 -k4,4 stop_codon.1bpbin_1.bed > stop_codon.1bpbin_2.bed

```

**# The first base of the 5' end was extracted from the uniquely mapped reads (\*.bam) and then converted to bed format**

**# for pair-end mapping**

```

samtools sort -n *.bam > *.sortbyname.bam
bamToBed -i *.sortbyname.bam -bedpe -mate1 > *.sortbyname.bedpe
awk '{if($9=="+") {print $1,$2,$2+1,$7,$8,$9} else {print $1,$3-1,$3,$7,$8,$9}}' OFS="\t"
*.sortbyname.bedpe > *.onebase.bed

```

**# for single-end mapping**

```

bamToBed -i *.bam | awk '{if($6=="+") {$3=$2+1;print $0} else {$2=$3-1;print $0}}' OFS="\t" >
*.onebase.bed

```

**# Calculate the read coverage (RPKM) around the start or stop codon for reads mapped to sense or antisense strand, respectively**

**# the number 89.58 was calculated from 1000 / library size (M)**

**# column 9 (\$9) is gene length**

```

coverageBed -a start_codon.1bpbin_2.bed -b *.onebase.bed -s | awk '{print $4,$5,$7*89.58/$9}'
OFS="\t" | sort -k1,1 -k2,2n > *start.sense.txt
coverageBed -a stop_codon.1bpbin_2.bed -b *.onebase.bed -s | awk '{print $4,$5,$7*89.58/$9}'
OFS="\t" | sort -k1,1 -k2,2n > *stop.sense.txt

```

```

coverageBed -a start_codon.1bpbin_2.bed -b *.onebase.bed -S | awk '{print $4,$5,$7*89.58/$9}'
OFS="\t" | sort -k1,1 -k2,2n > *start.antisense.txt
coverageBed -a stop_codon.1bpbin_2.bed -b *.onebase.bed -S | awk '{print $4,$5,$7*89.58/$9}'
OFS="\t" | sort -k1,1 -k2,2n > *stop.antisense.txt

```

**# Prepare the data for plotting**

```

require(ggplot2)
metaplot_1<-function(a){
  i=floor(length(a[,1])*0.01)
  j=ceiling(length(a[,1])*0.99)
  a.sort=apply(a,2,sort)
  a.trim=a.sort[i:j,]
}

```

```

a.mean=apply(a.trim,2,mean)
a.se=apply(a.trim,2,sd)/sqrt(length(a.trim[,1]))
a.d=data.frame(x=seq(-99,100,1),mean=a.mean,se=a.se) }

```

```

metaplot_2<-function(a){
  i=floor(length(a[,1])*0.01)
  j=ceiling(length(a[,1])*0.99)
  a.sort=apply(a,2,sort)
  a.trim=a.sort[i:j,]
  a.mean=apply(a.trim,2,mean)
  a.se=apply(a.trim,2,sd)/sqrt(length(a.trim[,1]))
  a.d=data.frame(x=seq(-99,100,1),mean=a.mean*(-1),se=a.se) }

```

```

start.sense<-read.table("*start.sense.txt", sep="\t")
start.m<-matrix(start[,3],ncol=200,byrow=T)
rownames(start.m)<-unique(start[,1])
write.table(start.m,file="*start.sense.m.txt",sep="\t", row.names=F)
start.sen.d<-metaplot_1(start.m)
start.sen.d$pos="start"
start.sen.d$sample_strand="sense"
write.table(start.sen.d,file="*start.sense.data.txt",sep="\t", row.names=F)

```

```

Start.anti<-read.table("*start.antisense.txt", sep="\t")
start.m<-matrix(start[,3],ncol=200,byrow=T)
rownames(start.m)<-unique(start[,1])
write.table(start.m,file="*start.anti.m.txt",sep="\t", row.names=F)
start.anti.d<-metaplot_2(start.m)
start.anti.d$pos=""start "
start.anti.d$sample_strand="anti"
write.table(start.anti.d,file="*start.anti.data.txt",sep="\t", row.names=F)

```

```

stop.sense<-read.table("*stop.sense.txt", sep="\t")
stop.m<-matrix(stop[,3],ncol=200,byrow=T)
rownames(stop.m)<-unique(stop[,1])
write.table(stop.m,file="*stop.sense.m.txt",sep="\t", row.names=F)
stop.sen.d<-metaplot_1(stop.m)
stop.sen.d$pos=""stop"
stop.sen.d$sample_strand="sense"
write.table(stop.sen.d,file="*stop.sen.data.txt",sep="\t", row.names=F)

```

```

stop.anti<-read.table("*stop.anti.txt", sep="\t")
stop.m<-matrix(stop[,3],ncol=200,byrow=T)
rownames(stop.m)<-unique(stop[,1])

```



```

write.table(stop.m,file="*stop.anti.m.txt",sep="\t", row.names=F)
stop.anti.d<-metaplot_2(stop.m)
stop.anti.d$pos="stop"
stop.anti.d$sample_strand="anti"
write.table(stop.anti.d,file="*stop.anti.data.txt",sep="\t", row.names=F)

data<-rbind(start.sen.d, start.anti.d, stop.sen.d, stop.anti.d)
write.table(data,file="meta_data_for_plotting.txt",sep="\t", row.names=F)

```

### # Plot the results of meta-analysis

```

data<-read.csv("meta_data_for_plotting.csv",head=T,stringsAsFactors = F)
head(data)
pdf("metaplot.pdf",width = 10, height = 2.8)
ggplot(data,aes(x=x,y=mean,colour=sample_strand))+
scale_color_manual(limits =
c("control1_sense","control2_sense","control3_sense","stress1_sense","stress2_sense","stress3_sense",
"control1_anti","control2_anti","control3_anti","stress1_anti","stress2_anti","stress3_anti"),v
alues=c("black","grey","red","orange","blue","darkgreen","black","grey","red","orange","blue","d
arkgreen")) +
geom_linerange(aes(x,ymin=mean-se,ymax=mean+se))+
geom_line(size=0.3)+
geom_hline(yintercept=0,colour="black",linetype="dashed",size=0.2)+
geom_vline(xintercept = 0,colour="black",linetype="dashed",size=0.2)+
labs(y = "Reads density",x= "Distance from
start_codon/stop_codon")+guides(size=guide_legend())+
theme(panel.grid.minor=element_blank(),panel.background=element_blank(),
panel.border=element_rect(fill=NA))+
facet_grid(~pos)
dev.off()

```
